# Supplementary material
Source: PubMed Central journal article supplement (PMC544623)
Supplement: pnas_102_4_1139__1.pdf [file pnas_102_4_1139__1.pdf]

**Table 3. Estimated number of copies of repeated and total viral cell junctions wc370.**

| Tissue fragment     | Repeated viral-cell junctions | Total no. PCR products* | Total no. of cells <sup>†</sup> |
|---------------------|-------------------------------|-------------------------|---------------------------------|
| 370.1 <sup>‡</sup>  | 13,122                        | 14,216                  | 1.2E+05                         |
|                     | 1,094                         |                         |                                 |
| 370.2 <sup>‡</sup>  | 9,842                         | 9,842                   | 6.8E+04                         |
| 370.3               | 81                            | 122                     | 6.6E+04                         |
| 370.4               | 27                            | 1,189                   | 1.8E+05                         |
|                     | 1,094                         |                         |                                 |
|                     | 27                            |                         |                                 |
|                     | 41                            |                         |                                 |
| 370.5 <sup>‡</sup>  | 3,281                         | 6,561                   | 1.5E+05                         |
| 370.6               | 122                           | 1,458                   | 1.4E+05                         |
|                     | 122                           |                         |                                 |
|                     | 81                            |                         |                                 |
| 370.7               | 0                             |                         | 1.0E+04                         |
| 370.8               | 0                             | 3,281                   | 4.3E+04                         |
| 370.9               | 365                           | 392                     | 2.5E+05                         |
|                     | 27                            |                         |                                 |
| 370.10              | 122                           | 365                     | 2.0E+05                         |
| 370.11              | 81                            | 3,281                   | 1.0E+05                         |
|                     | 81                            |                         |                                 |
|                     | 81                            |                         |                                 |
| 370.12 <sup>§</sup> | 365                           | 3,281                   | 2.0E+05                         |
|                     | 41                            |                         |                                 |
|                     | 41                            |                         |                                 |
|                     | 41                            |                         |                                 |
| 370.13 <sup>§</sup> | 1,094                         | 9,842                   | 2.2E+05                         |
| 370.14              | 0                             | 365                     | 4.8E+05                         |
| 370.15              | 0                             | 9,842                   | 2.2E+05                         |

\*Based on sequencing of randomly selected PCR products from this woodchuck, 33 of 48 (68%) were viral-cell junctions, whereas the remaining products contained only viral sequences. Because not all PCR products were sequenced, the results in the table have not been corrected for amplification of cccDNAs.

<sup>†</sup>Diploid genomes determined by real time PCR of the woodchuck *hcr* gene.

<sup>‡§</sup>These groups of sequences were the same and are presumed to represent the same clones.
