# Supplementary material
Source: PubMed Central journal article supplement (PMC544623)
Supplement: pnas_102_4_1139__2.pdf [file pnas_102_4_1139__2.pdf]

**Table 4. Estimated number of copies of repeated and total viral cell junctions wc371**

| <b>Tissue fragment</b> | <b>Repeated viral-cell junctions</b> | <b>Total no. PCR products*</b> | <b>Total no. of cells<sup>†</sup></b> |
|------------------------|--------------------------------------|--------------------------------|---------------------------------------|
| 371.1a                 | 3,281                                | 3,281                          | 8.7E+04                               |
| 371.3a                 | 122                                  | 1,094                          | 1.1E+05                               |
|                        | 122                                  |                                |                                       |
|                        | 365                                  |                                |                                       |
| 371.4a                 | 81                                   | 131                            | 4.4E+04                               |
|                        | 41                                   |                                |                                       |
|                        | 9                                    |                                |                                       |
| 371.5a                 | 365                                  | 3,281                          | 1.1E+05                               |
|                        | 122                                  |                                |                                       |
|                        | 81                                   |                                |                                       |
|                        | 81                                   |                                |                                       |
| 371.2b                 | 122                                  | 1,094                          | 5.8E+04                               |
|                        | 81                                   |                                |                                       |
|                        | 41                                   |                                |                                       |
|                        | 41                                   |                                |                                       |
| 371.5b                 | 1094                                 | 2187                           | 8.9E+04                               |
|                        | 365                                  |                                |                                       |

\*Based on sequencing of randomly selected PCR products from this woodchuck, 75 of 96 (78%) were viral-cell junctions, whereas the remaining products contained only viral sequences. Because not all PCR products were sequenced, the results in the table have not been corrected for amplification of cccDNAs.

<sup>†</sup>Diploid genomes determined by real-time PCR of the woodchuck *hcr* gene.
