# Supplementary material
Source: PubMed Central journal article supplement (PMC544623)
Supplement: pnas_102_4_1139__3.pdf [file pnas_102_4_1139__3.pdf]

**Table 5. Estimated number of copies of repeated and total viral cell junctions wc372**

| <b>Tissue fragment</b> | <b>Repeated viral-cell junctions</b> | <b>Total no. PCR products*</b> | <b>Total no. of cells<sup>†</sup></b> |
|------------------------|--------------------------------------|--------------------------------|---------------------------------------|
| 372.1                  | 0                                    | 203                            | 4.8E+04                               |
| 372.2                  | 729                                  | 972                            | 1.5E+05                               |
|                        | 122                                  |                                |                                       |
|                        | 81                                   |                                |                                       |
| 372.3                  | 41                                   | 1,094                          | 1.1E+05                               |
|                        | 41                                   |                                |                                       |
|                        | 81                                   |                                |                                       |
|                        | 41                                   |                                |                                       |
|                        | 41                                   |                                |                                       |
|                        | 27                                   |                                |                                       |
| 372.4                  | 41                                   | 285                            | 8.0E+04                               |
|                        | 122                                  |                                |                                       |
|                        | 122                                  |                                |                                       |
| 372.5                  | 122                                  | 3,281                          | 2.3E+05                               |
| 372.6                  | 365                                  | 1,094                          | 2.0E+05                               |
| 372.7                  | 81                                   | 729                            | 1.7E+05                               |
|                        | 41                                   |                                |                                       |
|                        | 41                                   |                                |                                       |
|                        | 122                                  |                                |                                       |
| 372.8                  | 365                                  | 1,823                          | 2.0E+05                               |
|                        | 365                                  |                                |                                       |
|                        | 81                                   |                                |                                       |
| 372.9                  | 0                                    | 365                            | 2.1E+05                               |
| 372.10                 | 243                                  | 365                            | 1.5E+05                               |
|                        | 81                                   |                                |                                       |
| 372.11                 | 122                                  | 3,281                          | 3.0E+05                               |
|                        | 122                                  |                                |                                       |
|                        | 122                                  |                                |                                       |
| 372.12                 | 3,281                                | 3,281                          | 3.5E+05                               |
| 372.13                 | 365                                  | 11,666                         | 2.7E+05                               |
|                        | 1,094                                |                                |                                       |

|        |      |       |         |
|--------|------|-------|---------|
|        | 365  |       |         |
|        | 9842 |       |         |
| 372.14 | 0    | 1,094 | 2.3E+05 |
| 372.15 | 243  | 6,561 | 2.7E+05 |
|        | 122  |       |         |

\*Based on sequencing of randomly selected PCR products from this woodchuck, 54 of 68 (79%) were viral-cell junctions, whereas the remaining products contained only viral sequences. Because not all PCR products were sequenced, the results in the table have not been corrected for amplification of cccDNAs.

†Diploid genomes determined by real-time PCR of the woodchuck *hcr* gene.
