# Supplementary material
Source: PubMed Central journal article supplement (PMC544623)
Supplement: pnas_102_4_1139__4.pdf [file pnas_102_4_1139__4.pdf]

## Supporting Text

**Clonal Expansion of Hepatocyte Variants in Chronic Hepatitis.** This analysis examines the quantitative relationship between the expansion of variant hepatocyte clones during liver turnover, based on a selective advantage of the variant. Two types of selective advantage are considered together: resistance to killing and preferential cell regeneration.

Assume a liver consisting of two cell types, designated  $c_0$  and  $c_1$ , where  $c_0$  cells are normal hepatocytes, and  $c_1$  cells are variants.  $c_0 = 1$  liver equivalent, and  $c_1 \ll c_0$  at all times. First-order kill rate constants for the two cell types are  $d_0$  and  $d_1$ . Normal hepatocytes,  $c_0$ , because they are in a vast majority, can be considered to regenerate at the same absolute rate as they are killed, and, with a first-order growth rate constant  $k_0 = d_0$ . Variant hepatocytes,  $c_1$ , may die and regenerate with different probabilities from that of  $c_0$ , so that  $k_1$  and  $d_1$  might not be equal to  $k_0$  or  $d_0$ . Because  $c_0(t) \gg c_1(t)$ , the extra mass added to the liver by the addition or depletion of  $c_1$  variants is neglected.

$$\frac{dc_0(t)}{dt} = c_0(t)(k_0 - d_0) = 0, \text{ and} \quad \frac{dc_1(t)}{dt} = c_1(t) \cdot (k_1 - d_1).$$

If  $a = \frac{k_1}{k_0}$  and  $b = \frac{d_1}{d_0}$ , where  $a, b \geq 0$ . The expansion of the variant is as follows:

$$\frac{c_1(t)}{c_0(t)} = e^{(a \cdot k_0 - b \cdot d_0)t}, \text{ and} \quad \ln\left(\frac{c_1(t)}{c_1(0)}\right) = (a \cdot k_0 - b \cdot d_0) \cdot t, \text{ or since } k_0 = d_0,$$

$$\ln\left(\frac{c_1(t)}{c_1(0)}\right) = (a - b) \cdot d_0 \cdot t.$$

Because  $d_0 \cdot t$  is the total hepatocyte killing, or the total turnover,  $T(t)$ , the relationship between clonal expansion of  $c_1$  and turnover is as follows:

$$\ln\left(\frac{c_1(t)}{c_1(0)}\right) = (a - b) \cdot T(t)$$

Fig. 5, which is published as supporting information on the PNAS web site, illustrates this relationship for five values of  $a - b$ , where  $a - b = 0$  represents no selective advantage for the variant.

**Clonal Outgrowth due to Random Turnover.** We previously published an analysis of the relationship between random turnover of a population of cells and the clonal distribution of cells in that population (1). Briefly, the distribution  $F(n, k)$  of clones, where  $n$  is the number of members in a clone and  $k$  is the number of cycles of random cell killing followed by random cell division, is given by recursive computation of the two equations:

$$f(n, k) = F(n, k - 1) / c - n \cdot F(n, k - 1) / c + (n + 1) \cdot F(n + 1, k - 1) / c$$

$$F(n, k) = f(n, k) - n \cdot f(n, k) / (c - 1) + (n - 1) \cdot f(n - 1, k) / (c - 1)$$

where  $F(n = 1, 0) = c$ ,  $F(n > 1, 0) = 0$ ,  $f(0, k) = 0$ , and  $n = 0 \rightarrow c$ . To calculate how many cycles of killing would be required to expand one cell out of  $5 \times 10^5$  cells to a size of 1,000 or more cells, the equations were computed until

$$\sum_{n=1,000}^{n=c} F(n, k) = \frac{c}{5 \cdot 10^5},$$

where  $c = 10,000$ . The expression represents the number of clones of size  $>1000$  cells when  $c$  cells undergo  $k$  cycles of killing and regeneration. When  $c = 10,000$  the number of clones is 0.02. On average, one clone will expand to a size of 1,000 cells or more when  $10,000/c$ , or  $5 \times 10^5$  cells, undergo  $k/c$  turnovers. The number of turnovers that satisfied this condition was 123.54.

1. Summers, J., Jilbert, A. R., Yang, W., Aldrich, C. E., Saputelli, J., Litwin, S., Toll, E. & Mason, W. S. (2003) *Proc. Natl. Acad. Sci. USA* **100**, 11652–11659.
