# Supplementary material
Source: PubMed Central journal article supplement (PMC544623)

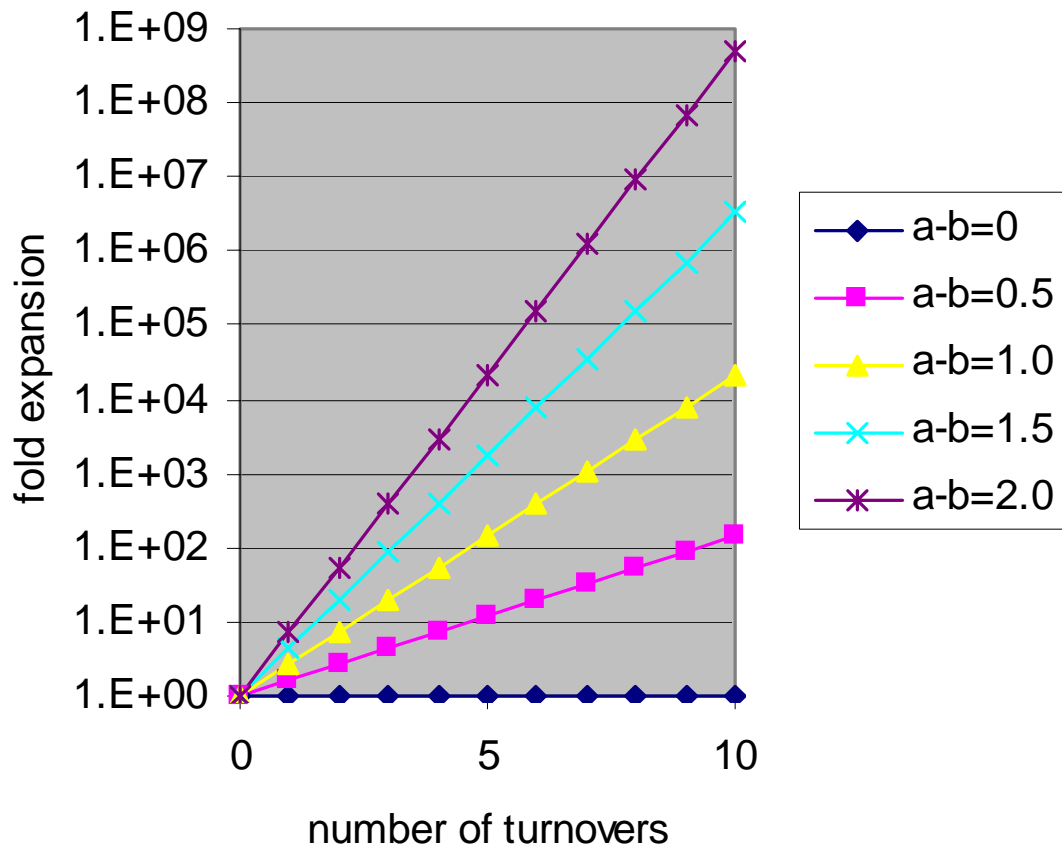

Supplement: pnas_102_4_1139__5.pdf [file pnas_102_4_1139__5.pdf]
